# Supplementary material
Source: publisher site journal article supplement (https://www.dovepress.com/article/supplementary_file/525278/525278%20Revised%20Supplementary%20File%201.xlsx)
Supplement: Supplementary file 1 [file 525278%20Revised%20Supplementary%20File%201.xlsx]

## Sheet: correlation table
			Supplementary File 1. Correlation Matrix of Leadership Engagement Survey Items
					I am fully aware of student leadership opportunities in my college.	I am fully aware of student leadership opportunities in my university.	I am fully aware of training opportunities (e.g. workshops, seminars) related to student leadership.	I am fully aware of how to apply for student leadership opportunities in my university.	I have the necessary skills required of a student leader.	I am/would be unable to resolve conflicts among my teammates.	I am/would be able to evaluate my teammates’ performance and give constructive feedback.	Being involved in student leadership is/would be time-consuming.	Being involved in student leadership distracts/would distract from academic responsibilities.	Being involved in student leadership is/would help develop my interpersonal skills.	Being involved in student leadership is/would be of benefit to my college.	Being involved in student leadership is/would make students’ voices be heard.	Being involved in student leadership is/would be of benefit to my future professional practice.	I will get recognition from my college if I am involved in student leadership.	I will get recognition from my peers if I am involved in student leadership.	I intend to apply for/continue in student leadership positions.	Compared to my other student tasks, being involved in student leadership is/would be high priority.	Memory1_R	I am/would be able to easily make decisions as a leader.	Other students think I should participate in student leadership.	Most people who are important to me (e.g. family, close friends) think I should participate in student leadership.	I am/would be enthusiastic about being a student leader.	I have/ can have a clear plan of how I will carry out my student leadership roles and responsibilities.
			I am fully aware of student leadership opportunities in my college.	Pearson Correlation	1	.616**	.404**	.587**	0.121	-0.066	.148*	-0.093	-0.04	.200**	.240**	.151*	.248**	.259**	.159*	0.095	0.141	-0.013	0.117	.176*	0.074	.231**	.289**
				Sig. (2-tailed)		<.001	<.001	<.001	0.107	0.378	0.048	0.216	0.594	0.007	0.001	0.044	<.001	<.001	0.033	0.205	0.06	0.86	0.118	0.018	0.327	0.002	<.001
				N	179	179	179	179	179	179	179	179	179	179	179	179	179	179	179	179	179	179	179	179	179	179	179
			I am fully aware of student leadership opportunities in my university.	Pearson Correlation	.616**	1	.413**	.613**	0.097	-0.071	0.134	-0.08	-.148*	0.11	.192*	.195**	.250**	.271**	.239**	0.115	.190*	-0.103	.181*	.159*	0.045	.154*	.254**
				Sig. (2-tailed)	<.001		<.001	<.001	0.195	0.343	0.073	0.285	0.047	0.143	0.01	0.009	<.001	<.001	0.001	0.124	0.011	0.171	0.015	0.034	0.552	0.04	<.001
				N	179	179	179	179	179	179	179	179	179	179	179	179	179	179	179	179	179	179	179	179	179	179	179
			I am fully aware of training opportunities (e.g. workshops, seminars) related to student leadership.	Pearson Correlation	.404**	.413**	1	.475**	0.105	-0.088	.237**	-0.072	-0.114	0.096	.150*	0.118	.191*	.198**	0.131	0.07	.219**	0.088	0.077	0.084	.149*	0.099	.196**
				Sig. (2-tailed)	<.001	<.001		<.001	0.164	0.24	0.001	0.335	0.128	0.202	0.045	0.116	0.01	0.008	0.08	0.352	0.003	0.239	0.308	0.266	0.046	0.188	0.009
				N	179	179	179	179	179	179	179	179	179	179	179	179	179	179	179	179	179	179	179	179	179	179	179
			I am fully aware of how to apply for student leadership opportunities in my university.	Pearson Correlation	.587**	.613**	.475**	1	.212**	-0.093	.190*	-0.042	-.159*	.175*	.211**	.169*	.248**	.253**	.238**	0.073	.151*	0.008	0.126	.166*	0.056	.174*	.224**
				Sig. (2-tailed)	<.001	<.001	<.001		0.004	0.217	0.011	0.573	0.034	0.019	0.005	0.024	<.001	<.001	0.001	0.334	0.043	0.917	0.092	0.026	0.458	0.02	0.003
				N	179	179	179	179	179	179	179	179	179	179	179	179	179	179	179	179	179	179	179	179	179	179	179
			I have the necessary skills required of a student leader.	Pearson Correlation	0.121	0.097	0.105	.212**	1	-0.013	.411**	-0.041	0.105	.327**	.304**	.325**	.258**	.185*	.291**	.479**	.318**	.188*	.444**	.567**	.525**	.499**	.389**
				Sig. (2-tailed)	0.107	0.195	0.164	0.004		0.863	<.001	0.587	0.161	<.001	<.001	<.001	<.001	0.013	<.001	<.001	<.001	0.012	<.001	<.001	<.001	<.001	<.001
				N	179	179	179	179	179	179	179	179	179	179	179	179	179	179	179	179	179	179	179	179	179	179	179
			I am/would be unable to resolve conflicts among my teammates.	Pearson Correlation	-0.066	-0.071	-0.088	-0.093	-0.013	1	-.152*	0.093	.229**	-0.116	-0.1	-0.081	-0.11	-.162*	-.147*	-.202**	-.171*	.285**	-0.025	-0.073	-0.009	-0.082	-0.058
				Sig. (2-tailed)	0.378	0.343	0.24	0.217	0.863		0.043	0.215	0.002	0.122	0.183	0.284	0.142	0.031	0.049	0.007	0.022	<.001	0.74	0.331	0.907	0.277	0.441
				N	179	179	179	179	179	179	179	179	179	179	179	179	179	179	179	179	179	179	179	179	179	179	179
			I am/would be able to evaluate my teammates’ performance and give constructive feedback.	Pearson Correlation	.148*	0.134	.237**	.190*	.411**	-.152*	1	-0.053	-0.091	.313**	.225**	.208**	.319**	.255**	.290**	.319**	.299**	0.062	.372**	.293**	.300**	.335**	.499**
				Sig. (2-tailed)	0.048	0.073	0.001	0.011	<.001	0.043		0.477	0.225	<.001	0.002	0.005	<.001	<.001	<.001	<.001	<.001	0.413	<.001	<.001	<.001	<.001	<.001
				N	179	179	179	179	179	179	179	179	179	179	179	179	179	179	179	179	179	179	179	179	179	179	179
			Being involved in student leadership is/would be time-consuming.	Pearson Correlation	-0.093	-0.08	-0.072	-0.042	-0.041	0.093	-0.053	1	.492**	-.189*	-0.124	-0.064	-0.106	-0.122	-0.12	0.066	0.104	.167*	0.002	0.009	0.038	0.146	-0.027
				Sig. (2-tailed)	0.216	0.285	0.335	0.573	0.587	0.215	0.477		<.001	0.011	0.098	0.398	0.16	0.104	0.111	0.382	0.165	0.026	0.977	0.901	0.611	0.051	0.725
				N	179	179	179	179	179	179	179	179	179	179	179	179	179	179	179	179	179	179	179	179	179	179	179
			Being involved in student leadership distracts/would distract from academic responsibilities.	Pearson Correlation	-0.04	-.148*	-0.114	-.159*	0.105	.229**	-0.091	.492**	1	-0.051	-0.056	-0.004	-0.015	-.187*	-0.14	0.094	0.087	.498**	0.065	0.041	0.022	.201**	0.07
				Sig. (2-tailed)	0.594	0.047	0.128	0.034	0.161	0.002	0.225	<.001		0.497	0.455	0.953	0.838	0.012	0.061	0.212	0.244	<.001	0.391	0.586	0.772	0.007	0.354
				N	179	179	179	179	179	179	179	179	179	179	179	179	179	179	179	179	179	179	179	179	179	179	179
			Being involved in student leadership is/would help develop my interpersonal skills.	Pearson Correlation	.200**	0.11	0.096	.175*	.327**	-0.116	.313**	-.189*	-0.051	1	.619**	.649**	.701**	.433**	.444**	.347**	.219**	0.043	.185*	.271**	.252**	.434**	.238**
				Sig. (2-tailed)	0.007	0.143	0.202	0.019	<.001	0.122	<.001	0.011	0.497		<.001	<.001	<.001	<.001	<.001	<.001	0.003	0.569	0.013	<.001	<.001	<.001	0.001
				N	179	179	179	179	179	179	179	179	179	179	179	179	179	179	179	179	179	179	179	179	179	179	179
			Being involved in student leadership is/would be of benefit to my college.	Pearson Correlation	.240**	.192*	.150*	.211**	.304**	-0.1	.225**	-0.124	-0.056	.619**	1	.524**	.594**	.464**	.501**	.212**	.277**	-0.023	.284**	.306**	.317**	.321**	.198**
				Sig. (2-tailed)	0.001	0.01	0.045	0.005	<.001	0.183	0.002	0.098	0.455	<.001		<.001	<.001	<.001	<.001	0.004	<.001	0.764	<.001	<.001	<.001	<.001	0.008
				N	179	179	179	179	179	179	179	179	179	179	179	179	179	179	179	179	179	179	179	179	179	179	179
			Being involved in student leadership is/would make students’ voices be heard.	Pearson Correlation	.151*	.195**	0.118	.169*	.325**	-0.081	.208**	-0.064	-0.004	.649**	.524**	1	.549**	.363**	.447**	.360**	.360**	0.022	.234**	.292**	.236**	.405**	.281**
				Sig. (2-tailed)	0.044	0.009	0.116	0.024	<.001	0.284	0.005	0.398	0.953	<.001	<.001		<.001	<.001	<.001	<.001	<.001	0.767	0.002	<.001	0.001	<.001	<.001
				N	179	179	179	179	179	179	179	179	179	179	179	179	179	179	179	179	179	179	179	179	179	179	179
			Being involved in student leadership is/would be of benefit to my future professional practice.	Pearson Correlation	.248**	.250**	.191*	.248**	.258**	-0.11	.319**	-0.106	-0.015	.701**	.594**	.549**	1	.484**	.498**	.372**	.293**	0.059	.208**	.273**	.247**	.383**	.296**
				Sig. (2-tailed)	<.001	<.001	0.01	<.001	<.001	0.142	<.001	0.16	0.838	<.001	<.001	<.001		<.001	<.001	<.001	<.001	0.434	0.005	<.001	<.001	<.001	<.001
				N	179	179	179	179	179	179	179	179	179	179	179	179	179	179	179	179	179	179	179	179	179	179	179
			I will get recognition from my college if I am involved in student leadership.	Pearson Correlation	.259**	.271**	.198**	.253**	.185*	-.162*	.255**	-0.122	-.187*	.433**	.464**	.363**	.484**	1	.674**	.278**	.236**	-0.066	.244**	.222**	.263**	.218**	.203**
				Sig. (2-tailed)	<.001	<.001	0.008	<.001	0.013	0.031	<.001	0.104	0.012	<.001	<.001	<.001	<.001		<.001	<.001	0.001	0.378	0.001	0.003	<.001	0.003	0.006
				N	179	179	179	179	179	179	179	179	179	179	179	179	179	179	179	179	179	179	179	179	179	179	179
			I will get recognition from my peers if I am involved in student leadership.	Pearson Correlation	.159*	.239**	0.131	.238**	.291**	-.147*	.290**	-0.12	-0.14	.444**	.501**	.447**	.498**	.674**	1	.306**	.183*	-0.075	.253**	.327**	.232**	.224**	.197**
				Sig. (2-tailed)	0.033	0.001	0.08	0.001	<.001	0.049	<.001	0.111	0.061	<.001	<.001	<.001	<.001	<.001		<.001	0.014	0.321	<.001	<.001	0.002	0.003	0.008
				N	179	179	179	179	179	179	179	179	179	179	179	179	179	179	179	179	179	179	179	179	179	179	179
			I intend to apply for/continue in student leadership positions.	Pearson Correlation	0.095	0.115	0.07	0.073	.479**	-.202**	.319**	0.066	0.094	.347**	.212**	.360**	.372**	.278**	.306**	1	.460**	0.051	.366**	.506**	.468**	.653**	.533**
				Sig. (2-tailed)	0.205	0.124	0.352	0.334	<.001	0.007	<.001	0.382	0.212	<.001	0.004	<.001	<.001	<.001	<.001		<.001	0.5	<.001	<.001	<.001	<.001	<.001
				N	179	179	179	179	179	179	179	179	179	179	179	179	179	179	179	179	179	179	179	179	179	179	179
			Compared to my other student tasks, being involved in student leadership is/would be high priority.	Pearson Correlation	0.141	.190*	.219**	.151*	.318**	-.171*	.299**	0.104	0.087	.219**	.277**	.360**	.293**	.236**	.183*	.460**	1	-0.038	.343**	.445**	.325**	.477**	.405**
				Sig. (2-tailed)	0.06	0.011	0.003	0.043	<.001	0.022	<.001	0.165	0.244	0.003	<.001	<.001	<.001	0.001	0.014	<.001		0.612	<.001	<.001	<.001	<.001	<.001
				N	179	179	179	179	179	179	179	179	179	179	179	179	179	179	179	179	179	179	179	179	179	179	179
			Memory1_R	Pearson Correlation	-0.013	-0.103	0.088	0.008	.188*	.285**	0.062	.167*	.498**	0.043	-0.023	0.022	0.059	-0.066	-0.075	0.051	-0.038	1	0.07	0.071	0.031	0.105	0.11
				Sig. (2-tailed)	0.86	0.171	0.239	0.917	0.012	<.001	0.413	0.026	<.001	0.569	0.764	0.767	0.434	0.378	0.321	0.5	0.612		0.349	0.344	0.678	0.162	0.142
				N	179	179	179	179	179	179	179	179	179	179	179	179	179	179	179	179	179	179	179	179	179	179	179
			I am/would be able to easily make decisions as a leader.	Pearson Correlation	0.117	.181*	0.077	0.126	.444**	-0.025	.372**	0.002	0.065	.185*	.284**	.234**	.208**	.244**	.253**	.366**	.343**	0.07	1	.397**	.386**	.463**	.455**
				Sig. (2-tailed)	0.118	0.015	0.308	0.092	<.001	0.74	<.001	0.977	0.391	0.013	<.001	0.002	0.005	0.001	<.001	<.001	<.001	0.349		<.001	<.001	<.001	<.001
				N	179	179	179	179	179	179	179	179	179	179	179	179	179	179	179	179	179	179	179	179	179	179	179
			Other students think I should participate in student leadership.	Pearson Correlation	.176*	.159*	0.084	.166*	.567**	-0.073	.293**	0.009	0.041	.271**	.306**	.292**	.273**	.222**	.327**	.506**	.445**	0.071	.397**	1	.595**	.536**	.404**
				Sig. (2-tailed)	0.018	0.034	0.266	0.026	<.001	0.331	<.001	0.901	0.586	<.001	<.001	<.001	<.001	0.003	<.001	<.001	<.001	0.344	<.001		<.001	<.001	<.001
				N	179	179	179	179	179	179	179	179	179	179	179	179	179	179	179	179	179	179	179	179	179	179	179
			Most people who are important to me (e.g. family, close friends) think I should participate in student leadership.	Pearson Correlation	0.074	0.045	.149*	0.056	.525**	-0.009	.300**	0.038	0.022	.252**	.317**	.236**	.247**	.263**	.232**	.468**	.325**	0.031	.386**	.595**	1	.480**	.307**
				Sig. (2-tailed)	0.327	0.552	0.046	0.458	<.001	0.907	<.001	0.611	0.772	<.001	<.001	0.001	<.001	<.001	0.002	<.001	<.001	0.678	<.001	<.001		<.001	<.001
				N	179	179	179	179	179	179	179	179	179	179	179	179	179	179	179	179	179	179	179	179	179	179	179
			I am/would be enthusiastic about being a student leader.	Pearson Correlation	.231**	.154*	0.099	.174*	.499**	-0.082	.335**	0.146	.201**	.434**	.321**	.405**	.383**	.218**	.224**	.653**	.477**	0.105	.463**	.536**	.480**	1	.480**
				Sig. (2-tailed)	0.002	0.04	0.188	0.02	<.001	0.277	<.001	0.051	0.007	<.001	<.001	<.001	<.001	0.003	0.003	<.001	<.001	0.162	<.001	<.001	<.001		<.001
				N	179	179	179	179	179	179	179	179	179	179	179	179	179	179	179	179	179	179	179	179	179	179	179
			I have/ can have a clear plan of how I will carry out my student leadership roles and responsibilities.	Pearson Correlation	.289**	.254**	.196**	.224**	.389**	-0.058	.499**	-0.027	0.07	.238**	.198**	.281**	.296**	.203**	.197**	.533**	.405**	0.11	.455**	.404**	.307**	.480**	1
				Sig. (2-tailed)	<.001	<.001	0.009	0.003	<.001	0.441	<.001	0.725	0.354	0.001	0.008	<.001	<.001	0.006	0.008	<.001	<.001	0.142	<.001	<.001	<.001	<.001
				N	179	179	179	179	179	179	179	179	179	179	179	179	179	179	179	179	179	179	179	179	179	179	179
			** Correlation is significant at the 0.01 level (2-tailed).
			* Correlation is significant at the 0.05 level (2-tailed).
